# Supplementary material
Source: Springer Nature journal article supplement (https://www.springermedizin.de/resource/supplementary/12943_2010_814_MOESM16_ESM.pdf/9554896)

**A**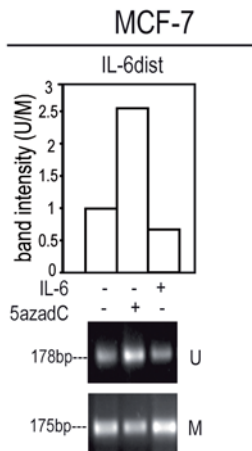**B**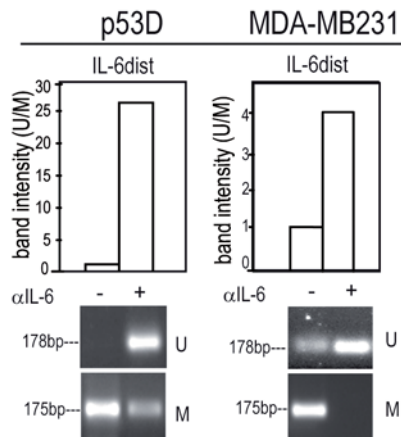**C**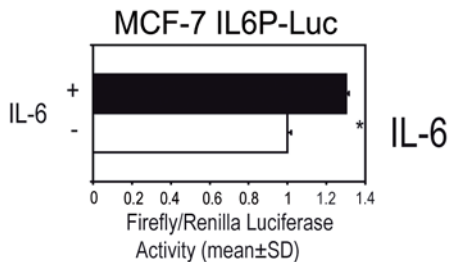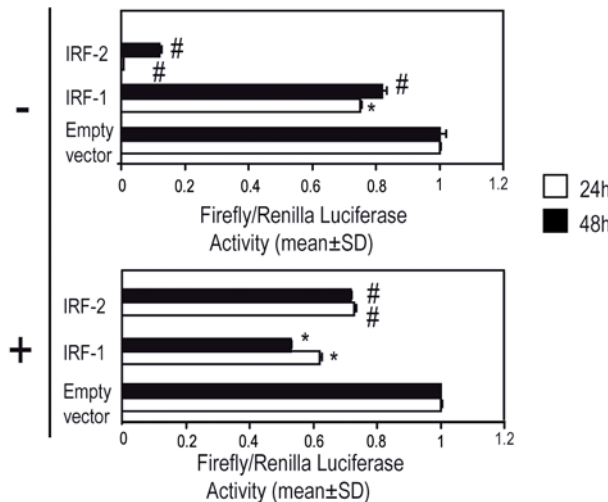

Supplement: MOESM16 [file 9554896]
